# Supplementary material for: Identification of a Novel Wnt Antagonist Based Therapeutic and Diagnostic Target for Alzheimer’s Disease Using a Stem Cell-Derived Model
Source: MDPI journal article supplement (doi:10.3390/bioengineering10020192), 2023-02-02
Supplement: s1 [file s1]

## **Supplementary information**

### **Identification of a novel Wnt antagonist based therapeutic and diagnostic target for Alzheimer's disease using a stem cell derived model**

#### **Supplementary methods**

##### **Molecular analysis**

Total RNA was extracted from the cells using RNAiso plus reagent (Trizol, TaKaRa, Japan) and complementary DNA (cDNA) synthesis was carried out using PrimeScript™ 1<sup>st</sup> strand cDNA synthesis kit (TaKaRa, Japan) and gene expression was analysed by PCR using 2X EmeraldAmp® GT PCR Master Mix (TaKaRa, Japan) with respective primers (procured from Sigma, sequence as indicated in Table S1) and resolving the amplified products on 2% agarose gel.

Real-time PCR or qRT-PCR was performed using SYBR® Premix Ex Taq™ (TaKaRa, Japan) in MicroAmp Optical 8-tube and cap strips (Applied Biosystems, USA) with PCR parameters were as per manufacturer's instructions. Primer sequences are indicated in Table S1.

##### **CFU-F assay**

AM-MSC at passage 1 and 2 were plated at  $1 \times 10^4$  cells per 60mm culture dish and incubated for 7 days at 37°C in 5% humidified CO<sub>2</sub>. The cells were washed with PBS and stained with 0.5% crystal violet (HiMedia, India). Isolated colonies with more than 50 cells were counted and the colony formation efficiency was estimated (number of colonies per  $10^4$  cells).

##### **Immunofluorescence**

Spent medium was removed from the cells and a PBS wash was given. The cells were fixed with 4% paraformaldehyde (PFA) for 15min and permeabilised with 0.1% Triton X-100 in PBS for 15min at room temperature. The cells were washed with PBS and then blocked with 3% bovine serum albumin (BSA) at room temperature for 30min. The cells were then incubated

with specific primary antibody at 4°C, overnight (Table S2). The cells were washed once with PBS with 0.1% tween-20 (PBST) and incubated with respective secondary antibody at room temperature for 1h (Table S2). After removing the secondary antibody, the cells were washed with PBST and then the nucleus was stained with 4',6-diamidino-2-phenylindole (DAPI) (HiMedia, India, cat#MB097, 1:10000 dilution). The cells were observed on an inverted fluorescent microscope Nikon Eclipse TE 2000-U (Nikon, Japan) and Olympus IX73 (Olympus, Japan). They were imaged using Qimaging-QICAM-fast 1394 software and further analysed with ImageJ.

### **Flow cytometric analysis**

Cells were fixed with 4% PFA at room temperature for 20min followed by PBST wash. The cells were then either permeabilized with 0.1% Triton X-100 in PBS or directly blocked with 3%BSA for 30min and then incubated with specific antibodies at room temperature for 2h (Table S2). The cells were either incubated with secondary antibody (Table S2) or directly acquired using BD-FACS Calibur flow cytometer (BD Biosciences, USA) along with respective isotype controls and data was analyzed by Cell Quest Pro Software.

### **Trilineage differentiation in AM-MSC**

AM-MSC were characterized for differentiation into adipogenic, osteogenic and chondrogenic lineages.

Adipogenesis was induced using medium containing dexamethasone (1μM), isobutyl methyl xanthin (0.5mM), indomethacin (200μM) and insulin (1μg/mL) in DMEM-HG for about 15-20days till the lipid droplets were visible which were stained by Oil red 'O' after fixation.

AM-MSC were induced for osteogenic differentiation by using medium containing ascorbic acid (500μg/mL), β-glycerophosphate (10mM), dexamethasone (1μM) in DMEM-HG for 20 days. The calcium deposits were stained with 2% Alizarin Red to confirm differentiation.

Chondrogenic differentiation was achieved using medium containing ascorbic acid (50µg/mL), dexamethasone (0.1µM), insulin transferrin selenium (ITS) (1X) transforming growth factor (TGF-β1) (10ng/mL) and sodium pyruvate (100µg/mL) for 20 days. The differentiated cells were fixed and stained with 1% Alcian blue to stain the glycosaminoglycans.

All the differentiation components were purchased from Sigma-Aldrich, St Louis, MO, USA. The stained cells were observed under bright-field phase contrast microscope (Nikon-Eclipse TE2000-S; Japan) and the images were captured using QCapture software.

### **ROS assay**

Generation of reactive oxygen species (ROS) taking place during the process of degeneration was analysed using Fluorometric intracellular ROS kit (#MAK142, Sigma Aldrich, USA). Cells were seeded in triplicates at density of  $1 \times 10^4$  cells per well of 96-well plate. Next day, Aβ<sub>1-42</sub> was added for 24h followed by ROS estimation by detecting fluorescence at  $\lambda_{ex}$ -650/ $\lambda_{em}$ -675 nm using EnSight™ Multimode plate reader (Perkin Elmer, USA).

### **LDH assay**

Cellular damage and lactate deficit was assessed by determining the lactate dehydrogenase (LDH) activity using Pierce LDH cytotoxicity assay kit (cat# 88953, Thermo Fisher Scientific, USA) by measuring absorbance at 490nm and 680nm.

### **Acetylcholine activity**

Acetylcholine deficiency is linked to pathogenesis of AD, therefore, we determined Acetylcholine levels in the control and treatment samples using Amplex Red Acetylcholine/Acetylcholinesterase assay kit (Cat# A12217, Molecular Probes, USA) by following manufacturer's instructions.

### **Western Blotting**

Cells were lysed using RIPA buffer containing protease inhibitors and the resulting suspension was centrifuged at 12000rpm for 15min. the clear cell lysates were transferred to clean tube

and stored at -80°C till further use. The protein samples were then heated with Laemmli buffer and loaded on 12% SDS-Polyacrylamide gel. After resolving the samples, the proteins were transferred onto PVDF membrane using semi-dry blotting apparatus. The membrane was blocked with 3% BSA in 1X TBST to avoid non-specific binding. The blots were then incubated with primary antibodies at 1:1000 concentration on a rocking platform at 4°C overnight. The blots were then washed thrice with 1X TBST and HRP conjugated secondary antibody at 1:2000 dilution was added and incubated for 2h at room temperature. The blots were again washed thrice with 1X TBST and developed using Westernbright ECL HRP substrate (Advansta, USA) on ChemiDoc<sup>TM</sup> XRS+ (Bio-Rad, USA). Densitometric analysis was performed for the blots using ImageJ software.

## **ELISA**

Homogenates used for Western analysis were diluted in 1:5 ratio and Amyloid  $\beta$  levels were measured by indirect ELISA. Also, the supernatant/media from the cells was used to estimate the secreted Amyloid  $\beta$  levels. The cell lysates and supernatant were incubated overnight on a coated 96-well plate in triplicates at 4°C. The wells were washed thrice with 1XTBST and polyclonal anti-human Amyloid  $\beta$  antibody was added and the plate was placed on rocker for 4h. the primary antibody was collected and the wells were again washed thrice with 1XTBST and HRP conjugated secondary antibody was added and incubated for 2h at room temperature. After washing, substrate-TMB/H<sub>2</sub>O<sub>2</sub> was added and incubated for 30min at room temperature in dark. The reaction was stopped by adding 1M sulphuric acid and the absorbance was recorded at 450nm using EnSight<sup>TM</sup> Multimode plate reader (Perkin Elmer, USA).

## **TRAP**

100 $\mu$ L freshly prepared TRAP (NP40 lysis buffer) buffer was added to the cell pellet and incubated on ice for 30min. The suspension was centrifuged at 4°C for 30min at high speed.

After protein estimation by Bradford method, a PCR reaction was set as follows- 500ng protein lysate, 10µL SYBr® Premix Ex Taq II™ (TaKaRa, Japan), 1µL ACX primer and 1µL TS primer; final volume made up to 20µL with nuclease-free water. The reaction was set as 95°C- 30s, 60°C- 30s and 72°C-1min for 32 cycles. Telomerase activity in samples was calculated based on the threshold cycle value (Ct).

### **Section and tissue preparation**

Mice were euthanized by trained personnel using standard procedure and the brains were dissected from the body and fixed with 4% PFA overnight at 4°C. The brain tissue was dissected in mid-sagittal plane and embedded in paraffin. 50µm-thick coronal sectioning and H&E staining was performed at Anand Diagnostics, Bangalore, India.

### **Immunohistochemistry on mouse brain tissue**

Immunohistochemical staining was done by deparaffinizing brain sections and antigen retrieval. Slides were incubated with Rabbit anti-Human Amyloid- β antibody followed by secondary antibody (Table S1) and nucleus was stained with DAPI.

### **Congo red**

Congo red staining was performed on the unstained sections for detection of amyloid peptides. The sections were deparaffinised with xylene and washed in distilled water for 30s. The slides were then incubated for 20min in alkaline saturated NaCl solution made in 80% ethanol followed by incubation in alkaline Congo red solution made in NaCl saturated 80% ethanol. The slides were rinsed with 4 dips each of 95% and 100% ethanol. The slides were then mounted and allowed to air dry. The slides were then observed using phase contrast microscope (Nikon eclipse TE 2000-S) and the images were captured using Q-capture software.

### **Molecular analysis of mouse brain**

Mice were euthanized by standard procedure at CLATR by trained personnel and the brain tissue was washed in PBS. The cerebral cortex and hippocampus were dissected out. RNA was

extracted using RNAiso plus reagent and cDNA was prepared as previously mentioned. Gene expression analysis was carried out using specific mouse primers (Table S1).

### **List of abbreviations**

bp, base pair; BSA, Bovine serum albumin; cDNA, complementary DNA; Cx-Cortex; DAPI, 4',6-diamidino-2-phenylindole dihydrochloride; H&E, Haematoxylin and Eosin staining; Hpc-Hippocampus; ITS, Insulin transferrin selenium; PBS, Phosphate-buffered saline; PFA, Paraformaldehyde; RNAi, RNA interference

## Supplementary tables

**Table S1: List of primers used in the *in vitro* and *in vivo* study of AD**

| Gene                        | Sequence                                   | Product length (bp) | Annealing temperature (°C) |
|-----------------------------|--------------------------------------------|---------------------|----------------------------|
| <b><i>Human primers</i></b> |                                            |                     |                            |
| GAPDH                       | F: 5'-CGACCACTTGTC AAGCTCA-3'              | 202                 | 59                         |
|                             | R: 5'-AGGGGAGATT CAGTGTGGT-3'              |                     |                            |
| vimentin                    | F: 5'-<br>GGTACAAGTCCAAGTTTGCTGACCT-<br>3' | 297                 | 60                         |
|                             | R: 5'-<br>CATTGAGCAGCTCTTGGTATTCACG-3'     |                     |                            |
| CD90                        | F: 5'-ATGAACCTGGCCATCAGCA-3'               | 218                 | 56                         |
|                             | R: 5'-GTGTGCTCAGGCACCCC-3'                 |                     |                            |
| CD73                        | F: 5'-GCCGCTTTAGAGAATGCAAC-3'              | 234                 | 55                         |
|                             | R: 5'-CTCGACACTTGGTGCAAAGA-3'              |                     |                            |
| CD105                       | F: 5'-CCACTAGCCAGGTCTCGAAG-3'              | 192                 | 53                         |
|                             | R: 5'-GATGCAGGAAGACACTGCTG-3'              |                     |                            |
| CD34                        | F: 5'-<br>CTACAACACCTAGTACCCTTGGA -3'      | 185                 | 54                         |
|                             | R: 5'-GGTGAACACTGTGCTGATTACA-<br>3'        |                     |                            |
| synapsin1                   | F: 5'-TCAGACCTTCTACCCCAATCA-3'             | 127                 | 55                         |

|                  |                                  |     |      |
|------------------|----------------------------------|-----|------|
|                  | R: 5'-GTCCTGGAAGTCATGCTGGT-3'    |     |      |
| tuj1             | F: 5'-CGGGGCCGCGGCTATAAGAG-3'    | 168 | 60   |
|                  | R: 5'-CAGCCTCACCTTGGCCCCGA-3'    |     |      |
| neurofilament    | F: 5'-CGCTATGCAGGACACGATCA-3'    | 255 | 60   |
|                  | R: 5'-CTGGTCTGTAAACCGCCGTA-3'    |     |      |
| neuropilin       | F: 5'- GAAGGCAACAACA ACTATGA-3'  | 354 | 60   |
|                  | R: 5'- ATGCTCCCAGTGGCAGAATG-3'   |     |      |
| ChAT             | F: 5'-ACTGGGTGTCTGAGTACTGG-3'    | 451 | 53   |
|                  | R: 5'-TTGGAAGCCATTTGACTAT-3'     |     |      |
| $\alpha 7$ nAChR | F: 5'-CCGACTCTGGGGTAGTGTGT-3'    | 250 | 55   |
|                  | R: 5'-ATGGTGCAGATGATGGTGAA-3'    |     |      |
| TH               | F: 5'-GCGCAGGAAGCTGATTGCTG-3'    | 200 | 56.8 |
|                  | R: 5'-TGTCTTCCCGGTAGCCGCTG-3'    |     |      |
| BACE1            | F: 5'- ACCGACGAAGAGTCGGAGGAG-3'  | 651 | 55   |
|                  | R: 5'-CACAATGCTCTTGTCATAG -3'    |     |      |
| MAP2             | F: 5'-TGCCATCTTGGTGCCGA-3'       | 360 | 55   |
|                  | R: 5'-CTTGACATTACCACCTCCAGGT-3'  |     |      |
| Neprilysin       | F: 5'-GCCTCAGCCGAACCTACAAG-3'    | 96  | 54   |
|                  | R: 5'-AATTTGCACAACGTCCTCAAGTT-3' |     |      |
| $\beta$ -catenin | F: 5'-CGTCCACAACACTCTGGCTA-3'    | 159 | 55   |
|                  | R: 5'-GCCAGCACTTCACTGCAATA-3'    |     |      |



|               |                                |     |    |
|---------------|--------------------------------|-----|----|
| GSK3- $\beta$ | F: 5'-ACTCCAGTGGCGAGAAGAAA-3'  | 241 | 55 |
|               | R: 5'-TTGAGGACAGCAGTGTCAGG-3'  |     |    |
| sFRP4         | F: 5'-CGATCGGTGCAAGTGTA AAA-3' | 181 | 60 |
|               | R: 5'-GACTTGAGTTCGAGGGATGG-3'  |     |    |
| Dkk1          | F: 5'-TCCGAGGAGAAATTGAGGAA-3'  | 157 | 52 |
|               | R: 5'-CCTGAGGCACAGTCTGATGA-3'  |     |    |
| NF $\kappa$ B | F: 5'-ATGGCTTCTATGAGGCTGAG-3'  | 128 | 62 |
|               | R: 5'-GTTGTTGTTGGTCTGGATGC-3'  |     |    |
| IKB           | F: 5'-TTGCTGAGTGACATTGCCTC-3'  | 252 | 54 |
|               | R: 5'-GAAGCTCCAGTAGTCGACGG-3'  |     |    |
| Axin          | F: 5'-CTGGCTATGTCTTTGCACCA-3'  | 113 | 58 |
|               | R: 5'-AGGAGGGATTCCATCTACGC-3'  |     |    |
| APC           | F: 5'-CCAGGAACTTCTTCAAAGCG-3'  | 181 | 53 |
|               | R: 5'-TATGGGCAGCAGAGCTTCTT-3'  |     |    |
| Dvl1          | F: 5'- CCACCCTGAACCTCAACAGT-3' | 202 | 54 |
|               | R: 5'-CCTTCACTCTGCTGACTCCC-3'  |     |    |
| NFAT          | F: 5'-TTCGGAAGGAGAGACGGAC-3'   | 213 | 55 |
|               | R: 5'-ACAGGACCATCTTCTTCCCG-3'  |     |    |
| CREB          | F: 5'-GCTGGCTAACAATGGTACCG-3'  | 242 | 55 |
|               | R: 5'-CTGGGGAGGATGCCATAACA-3'  |     |    |
| CalN          | F: 5'-GATGATGGTGGGGAACAATC-3'  | 127 | 54 |
|               | R: 5'-GCCACCTACAACAGCACAGA-3'  |     |    |
| CaMKII        | F: 5'-CCGACGACTACCAGCTCTTC-3'  | 159 | 55 |
|               | R: 5'-TCCGACCCTCACGTTCTAGT-3'  |     |    |

|                              |                                                                      |     |    |
|------------------------------|----------------------------------------------------------------------|-----|----|
| RhoA                         | F: 5'-CCATCGACAGCCCTGATAGT-3'                                        | 204 | 58 |
|                              | R: 5'-CGCCAATCCTGTTTGCCATA-3'                                        |     |    |
| hTERT                        | F: 5'-CGTGGTTTCTGTGTGGTGTC-3'                                        | 214 | 60 |
|                              | R: 5'-CCTTGTCGCCTGAGGAGTAG-3'                                        |     |    |
| TRAP                         | ACX: 5'-<br><br>GCGCGGCTTACCCTTACCCTTACCCT<br><br>AACC-3'            | --  | 60 |
|                              | TS: 5'-AATCCGTCGAGCAGAGTT-3'                                         |     |    |
| AD201<br>RNAi T7<br>promoter | F: 5'-<br><br>TAATACGACTCACTATAGGGAGACCA<br><br>TTTGCACCCTGGAGTTC-3' | 210 | 60 |
|                              | R:3'-<br><br>TAATACGACTCACTATAGGGAGATCC<br><br>ACTTAACATCCTCCGGG-3'  |     |    |
| Presenilin2                  | F:5'- ACGACCCGGAGATGGAAGAAG-<br><br>3'                               | 212 | 60 |
|                              | F:5'- CAGCGTGGTATTCCAGTCCC-3'                                        |     |    |
| APH1-A                       | F:5'-CATTTTCTGGCTGGTCTC-3'                                           | 188 | 60 |
|                              | R:5'-AACCCCTCATCTGCCTTCTT-3'                                         |     |    |
| Mouse Primers                |                                                                      |     |    |
| GAPDH                        | F: 5'-TGTGAACGGATTTGGCCGTA-3'                                        | 159 | 55 |
|                              | R: 5'-ACTGTGCCGTTGAATTTGCC-3'                                        |     |    |
| nestin                       | F-5'-CAGCGTTGGAACAGAGGTTGG-3'                                        | 389 | 60 |

|                  |                                     |     |    |
|------------------|-------------------------------------|-----|----|
|                  | R-5'-<br>TGGCACAGGTGTCTCAAGGGTAG-3' |     |    |
| tuj1             | F: 5'-TCCAGGAGCTGTTCAAGCG-3'        | 142 | 60 |
|                  | R: 5'-TCGGACACCAGGTCGTTC-3'         |     |    |
| ChAT             | F: 5'-CCCTGCCAGTCAACTCTAGC-3'       | 184 | 55 |
|                  | R: 5'-ATACAGAGAGGCTGCCCTGA-3'       |     |    |
| $\alpha$ 7nAChR  | F: 5'-CCGACTCTGGGGTAGTGTGT-3'       | 250 | 54 |
|                  | R: 5'-ATGGTGCAGATGATGGTGAA-3'       |     |    |
| BACE1            | F: 5'-ATGTGGAGATGACCGTAGGC-3'       | 160 | 55 |
|                  | R: 5'-TACACACCCTTTTCGGAGGTC-3'      |     |    |
| $\beta$ -catenin | F: 5'-CGTCCACAACACTCTGGCTA-3'       | 159 | 55 |
|                  | R: 5'-GCCAGCACTTCACTGCAATA-3'       |     |    |
| Dkk1             | F: 5'-TCCGAGGAGAAATTGAGGAA-3'       | 163 | 52 |
|                  | R: 5'-CCTGAGGCACAGTCTGATGA-3'       |     |    |
| GSK3- $\beta$    | F: 5'-ACTCCAGTGGCGAGAAGAAA-3'       | 241 | 55 |
|                  | R: 5'-TTGAGGACAGCAGTGTCAGG-3'       |     |    |
| Axin             | F: 5'-CTGGCTATGTCTTTGCACCA-3'       | 113 | 58 |
|                  | R: 5'-AGGAGGGATTCCATCTACGC-3'       |     |    |
| CalN             | F: 5'-GATGATGGTGGGGAACAATC-3'       | 127 | 54 |
|                  | R: 5'-GCCACCTACAACAGCACAGA-3'       |     |    |
| NFAT             | F: 5'-TTCGGAAAGGAGAGACGGAC-3'       | 213 | 55 |
|                  | R: 5'-ACAGGACCATCTTCTTCCCG-3'       |     |    |
| CREB             | F: 5'-GCTGGCTAACAATGGTACCG-3'       | 242 | 55 |
|                  | R: 5'-CTGGGGAGGATGCCATAACA-3'       |     |    |

|     |                               |     |    |
|-----|-------------------------------|-----|----|
| JNK | F: 5'-AGAAGCTCCACCACCAAAGA-3' | 154 | 55 |
|     | R: 5'-CTGTGCTAAAGGCGAGGGCT-3' |     |    |

**Table S2: List of primary and secondary antibodies used in the study**

| <b>Antibody</b>                                 | <b>Company</b>                | <b>Cat#, RRID</b>                     | <b>Dilution<br/>Immunofluorescence<br/>(IF)/ Flow cytometry<br/>(F)</b> |
|-------------------------------------------------|-------------------------------|---------------------------------------|-------------------------------------------------------------------------|
| <i>Primary antibodies</i>                       |                               |                                       |                                                                         |
| PE Mouse anti-Human CD73                        | BD<br>Pharmingen™,<br>USA     | 561014; RRID:<br>AB_2033967           | IF 1:500                                                                |
| Alexa fluor 488<br>Mouse anti-Human<br>Vimentin |                               | 562338, RRID:<br>AB_10896994          | IF 1:500                                                                |
| PE Mouse anti-Human CD34                        |                               | clone 563, 550761,<br>RRID: AB_393871 | IF 1:500, F 1:200                                                       |
| FITC Mouse anti-Human CD45                      |                               | 555482, RRID:<br>AB_395874            | IF 1:500                                                                |
| FITC recombinant anti-Human CD90                | Miltenyi Biotec,<br>CA        | clone REA897, RRID:<br>AB_2726842     | F 1:250                                                                 |
| PE recombinant anti-Human CD105                 |                               | clone REA794, RRID:<br>AB_2654427     | F 1:250                                                                 |
| Rabbit anti-Human Amyloid beta                  | Thermo Fisher Scientific, USA | 71-5800, RRID:<br>AB_2533989          | IF 1:1000                                                               |
| Rabbit anti-Synapsin1                           | Invitrogen, USA               | A6442, RRID:<br>AB_2536207            | IF 1:1000, F 1:1000                                                     |
| Mouse anti-beta tubulin (tuj1)                  | Thermo Fisher Scientific, USA | 480011, RRID:<br>AB_2532242           | IF 1:1000                                                               |

|                                                 |                                  |                                                  |                   |
|-------------------------------------------------|----------------------------------|--------------------------------------------------|-------------------|
| Rabbit anti-Human<br>MAPT                       | Cloud-Clone<br>corp, USA         | PAB983Hu01                                       | IF 1:500          |
| Rabbit anti-Human<br>ChAT                       |                                  | PAB929Hu01                                       | IF 1:500, F 1:200 |
| Mouse Anti-human<br>Beta Actin                  | Invitrogen                       | MA1-140, clone<br>15G5A11/E2<br>RRID: AB_2536844 | WB 1:1000         |
| <i>Secondary antibodies</i>                     |                                  |                                                  |                   |
| Goat anti-Rabbit<br>Alexa Flour 488<br>antibody | Thermo Fisher<br>Scientific, USA | A32731, RRID:<br>AB_2633280                      | 1:2000            |
| Goat anti-Mouse<br>Alexa Fluor 488<br>antibody  |                                  | A11029, RRID:<br>AB_2534088                      |                   |
| Goat anti-Rabbit<br>Alexa Fluor 594             |                                  | 11037, RRID:<br>AB_2534095                       |                   |
| Goat Anti-Rabbit<br>HRP                         |                                  | 32460, RRID:<br>AB_1185567                       |                   |
| Goat Anti-Mouse<br>HRP                          |                                  | 32430, RRID:<br>AB_1185566                       |                   |
