# Supplementary material for: Identification of a Novel Wnt Antagonist Based Therapeutic and Diagnostic Target for Alzheimer’s Disease Using a Stem Cell-Derived Model
Source: MDPI journal article supplement (doi:10.3390/bioengineering10020192), 2023-02-02
Supplement: s1 [file s1]

**Data S1. Compilation of agarose gel images (a-c). Agarose gel image corresponding to Figure 1 (S1-a), Figure 2 (S1-b) and Figure 4 (S1-c).**

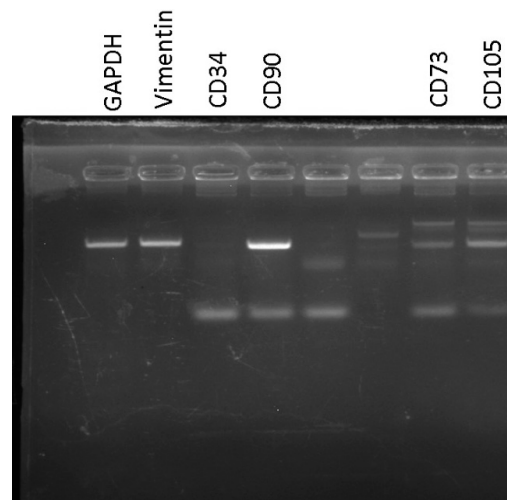

**(a)**

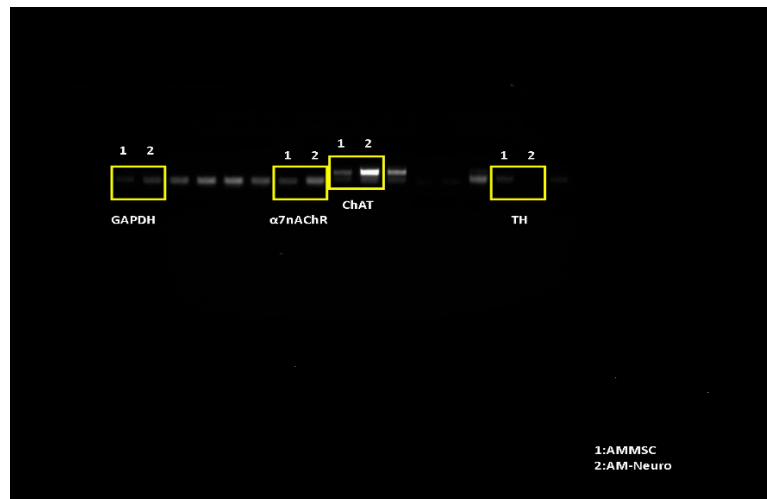

**(b)**

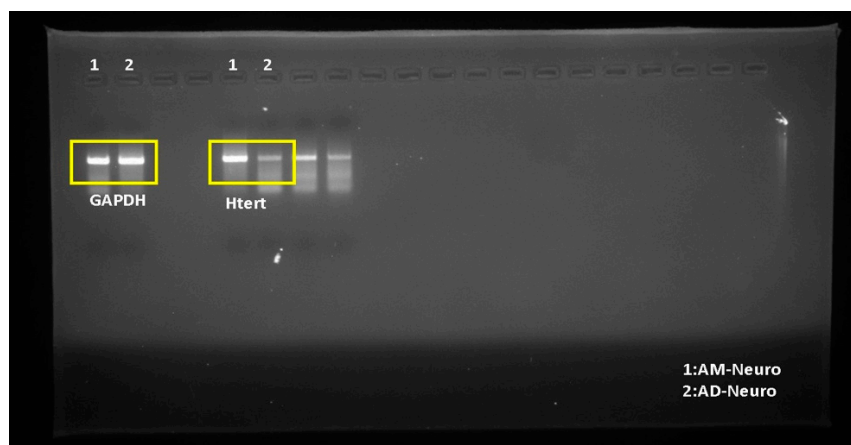

**(c)**

**Data S2: Compilation of Western blots corresponding to Figure 3.**

(1)  $\beta$ -actin

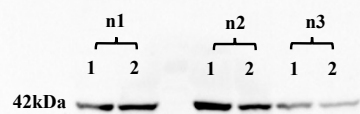

1:AM-Neuro

2:AD-Neuro

(2) Amyloid  $\beta$

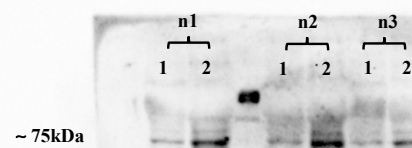

1:AM-Neuro

2:AD-Neuro
